# Supplementary material
Source: PubMed Central journal article supplement (PMC2662023)

SUPPLEMENTAL DATA

*Helicobacter pylori* SUPPRESSES GSK3 $\beta$  TO PROMOTE  $\beta$ -CATENIN ACTIVITY  
Olga Sokolova, Przemyslaw M. Bozko and Michael Naumann

**Figure S1. *H. pylori* and LiCl affect  $\beta$ -catenin phosphorylation**

MDCK cells were stimulated with *H. pylori* for 24 h. Sub-cellular fractions were separated by using ProteoExtract Kit and Western blot analysis was performed using specific antibodies. Different antigens were immunodetected to show appropriate separation of cellular fractions. C, cytosol; M, membrane/organelles fraction; N, nuclear fraction; CS, cytoskeleton.

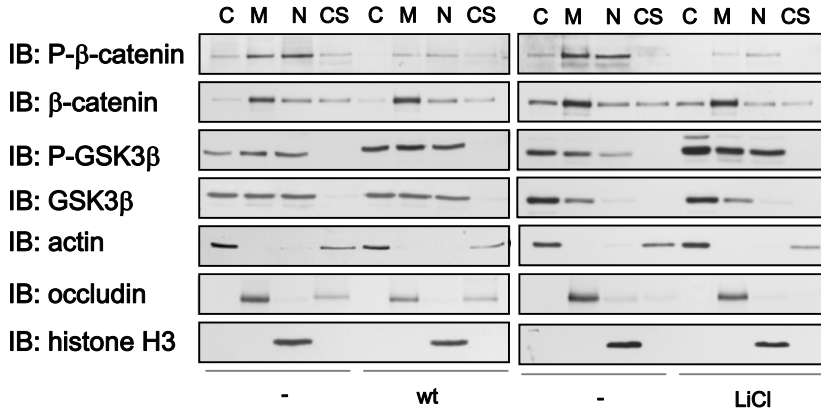

Supplement: M801818200_1.pdf [file M801818200_1.pdf]
